# Supplementary material for: Fast stomatal kinetics in sorghum enable tight coordination with photosynthetic responses to dynamic light intensity and safeguard high water use efficiency
Source: PubMed Central journal article supplement (PMC11565209; doi:10.1093/jxb/erae389), 2024-09-18
Supplement: erae389_suppl_supplementary_materials.pdf [file erae389_suppl_supplementary_materials.pdf]

**Supplemental Table S1.** *Sorghum bicolor* L. Moench Accessions used in this study

| Accession Number | Alternative Name             | Country of Origin     | Biological Status             |
|------------------|------------------------------|-----------------------|-------------------------------|
| IS 929           | PI 568989                    | Sudan                 | Traditional cultivar/Landrace |
| IS 1054          | PI 248264                    | India                 | Advanced/Improved cultivar    |
| IS 1127          | A 35                         | India                 | Traditional cultivar/Landrace |
| IS 2367          | Q2-4-74                      | Nigeria               | Traditional cultivar/Landrace |
| IS 2950          | R-16 / SA 7526-1-20-8-2-10-1 | USA                   | Breeding/Research material    |
| IS 3147          | DL 60/114                    | South Africa          | Traditional cultivar/Landrace |
| IS 3583          | HSD 7867                     | Sudan                 | Traditional cultivar/Landrace |
| IS 3971          | IC 8946                      | India                 | Traditional cultivar/Landrace |
| IS 5720          | Janera pipla                 | India                 | Traditional cultivar/Landrace |
| IS 8193          | KA 4                         | Uganda                | Breeding/Research material    |
| IS 9830          | PI 563310                    | Sudan                 | Traditional cultivar/Landrace |
| IS 10876         | BO50                         | Nigeria               | Traditional cultivar/Landrace |
| IS 10978         |                              | USA                   | Traditional cultivar/Landrace |
| IS 14556         |                              | Ethiopia              | Traditional cultivar/Landrace |
| IS 15428         | 2-1-6-7                      | Cameroon              | Traditional cultivar/Landrace |
| IS 16044         | 4-3-26-3                     | Cameroon              | Traditional cultivar/Landrace |
| IS 16173         | 4-1-3-15                     | Cameroon              | Traditional cultivar/Landrace |
| IS 18331         | N 13                         | India                 | Breeding/Research material    |
| IS 18551         | Jijwerjere 935               | Ethiopia              | Breeding/Research material    |
| IS 20351         | SG 2303                      | Niger                 | Traditional cultivar/Landrace |
| IS 20387         | SG 2375                      | Niger                 | Traditional cultivar/Landrace |
| IS 20709         | HDW 128                      | USA                   | Traditional cultivar/Landrace |
| IS 22040         | Yerra jonna                  | India                 | Traditional cultivar/Landrace |
| IS 23496         |                              | Ethiopia              | Traditional cultivar/Landrace |
| IS 23520         | Sima                         | Ethiopia              | Advanced/Improved cultivar    |
| IS 23988         | AR 220                       | Yemen                 | Traditional cultivar/Landrace |
| IS 24953         | No. 2360                     | Zambia                | Traditional cultivar/Landrace |
| IS 29472         |                              | Lesotho               | Traditional cultivar/Landrace |
| IS 31693         | S. bicolor 71                | Algeria               | Traditional cultivar/Landrace |
| IS 36556         | S-35                         | Nigeria               | Traditional cultivar/Landrace |
| IS 40583         | BTX 623                      | USA                   | Breeding/Research material    |
| IS 41245         | 296-B                        | India                 | Breeding/Research material    |
| EC 844883        | Framida                      | Birkina Faso          | Breeding/Research material    |
| EC 844884        | Grinkan / 02-sb-f4dt-275     | Mali                  | Breeding/Research material    |
| EC 844888        | DOUA-G                       | Ivory Coast           | Breeding/Research material    |
| EC 844889        | GNOSSICONI                   | Birkina Faso          | Breeding/Research material    |
| EC 844890        | RIBDAHU                      | Niger                 | Breeding/Research material    |
| EC 844891        | SAMBALMA                     | Nigeria               | Breeding/Research material    |
| EC 844892        | GPN01 S01 -9-3-3-VAR         | Mali                  | Breeding/Research material    |
| EC 844893        | GPN01 S01 -9-3-1-1           | Mali                  | Breeding/Research material    |
| EC 844902        | GPN01 S01 -9-V1-2-34- 2      | Mali                  | Breeding/Research material    |
| EC 844903        | CSM63-E                      | Mali                  | Breeding/Research material    |
| EC 844904        | BBISS-08                     | Wild (unknown region) | Breeding/Research material    |

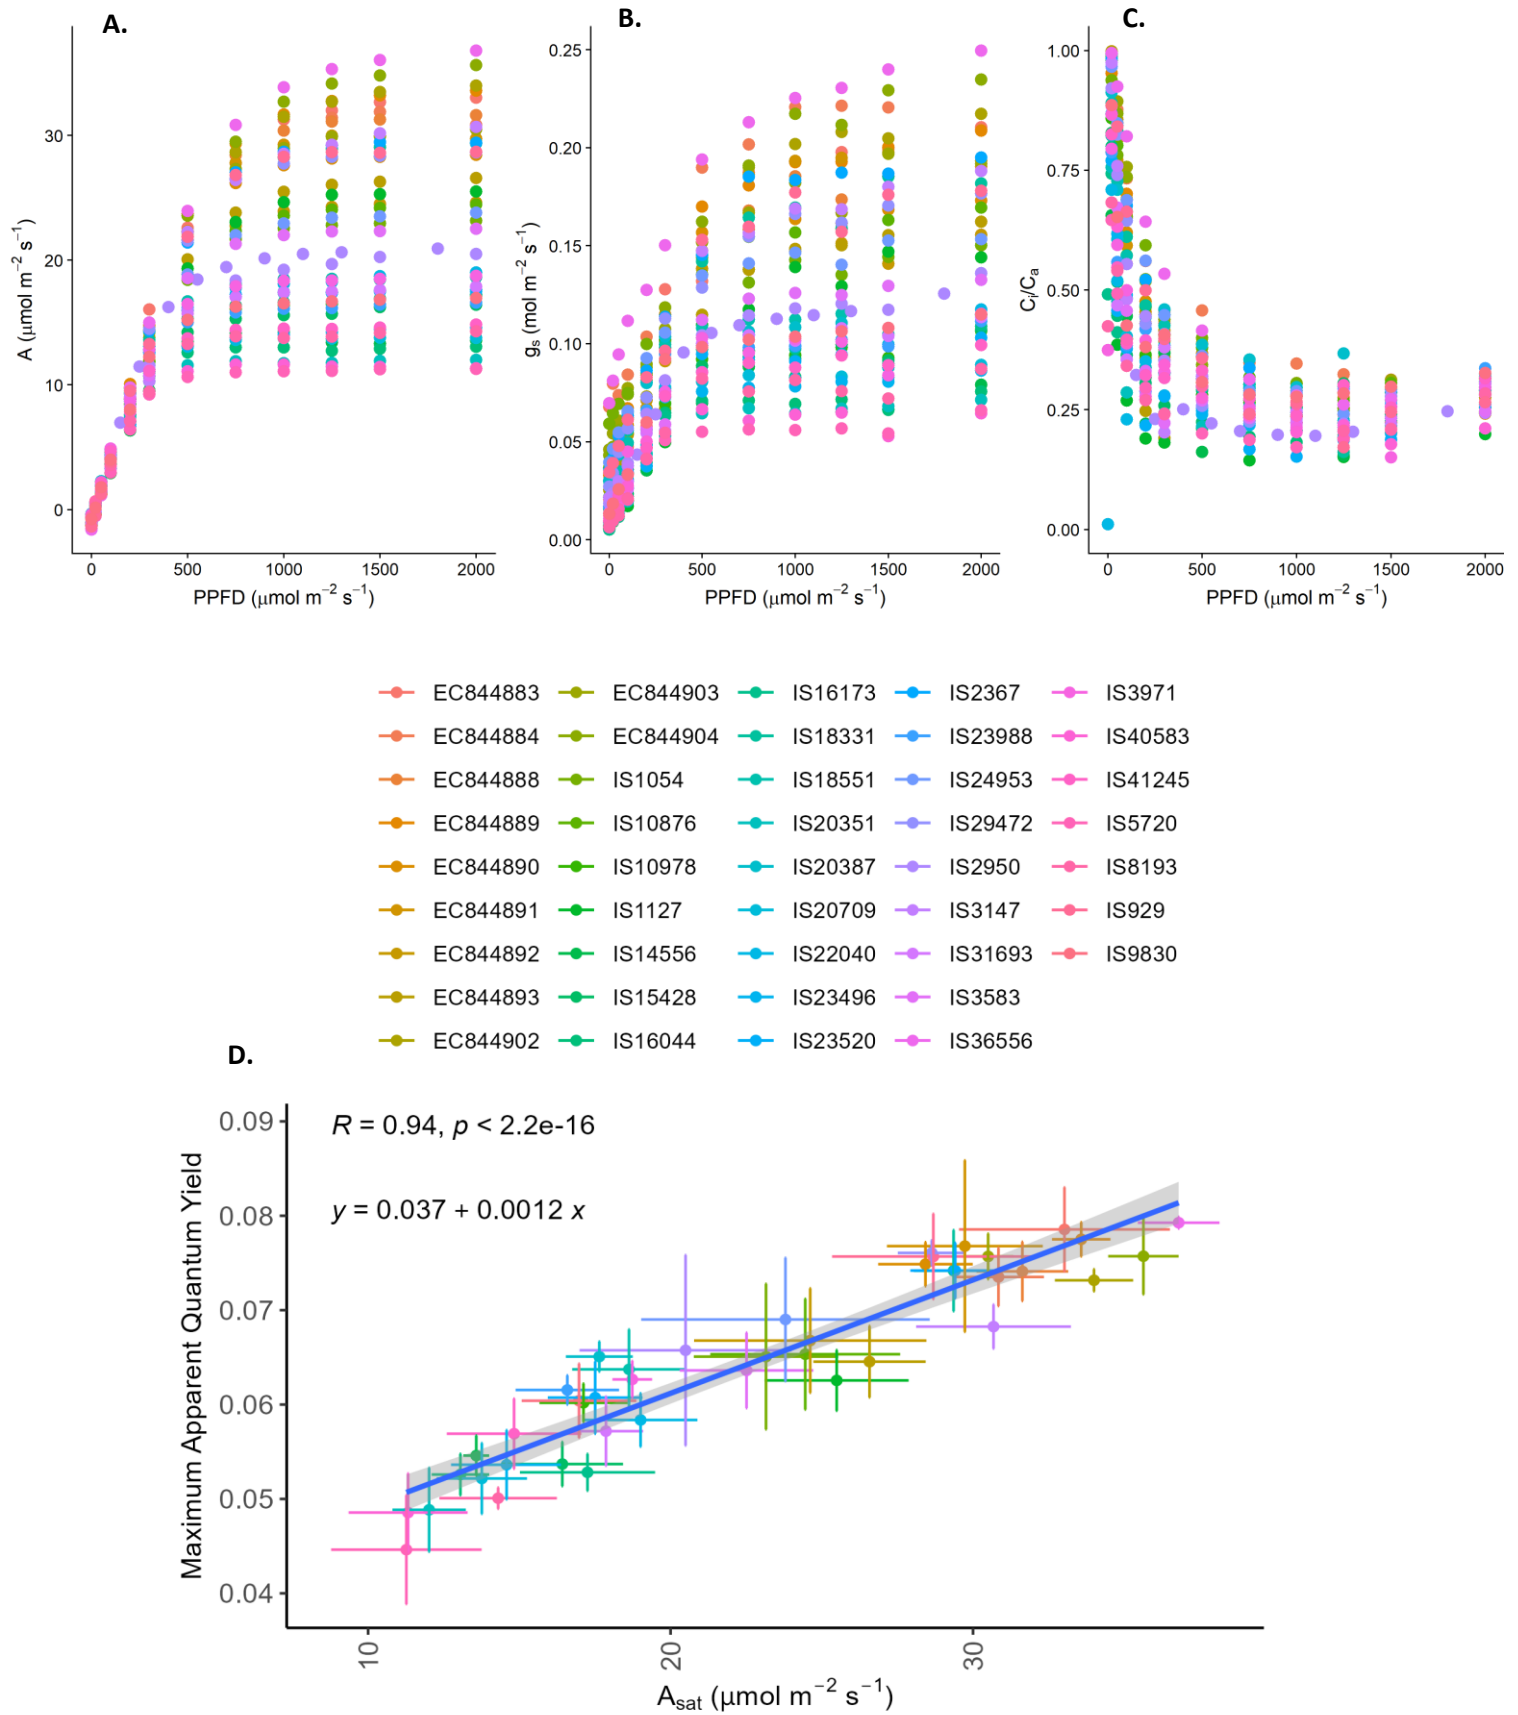

**Supplementary Fig. S1.** Relationship between maximum apparent quantum yield and photosynthetic CO<sub>2</sub> assimilation at 2000  $\mu\text{mol m}^{-2} \text{s}^{-1}$  ( $A_{\text{sat}}$ ) for the 43 sorghum accessions tested in this study. Points indicate mean values for the accession of the associated colour. Error bars indicate standard error of the mean,  $n = 3-8$ . Line represents  $R = 0.94$ ,  $p < 2.2e-16$  with a regression formula of  $y = 0.037 + 0.0012x$ .

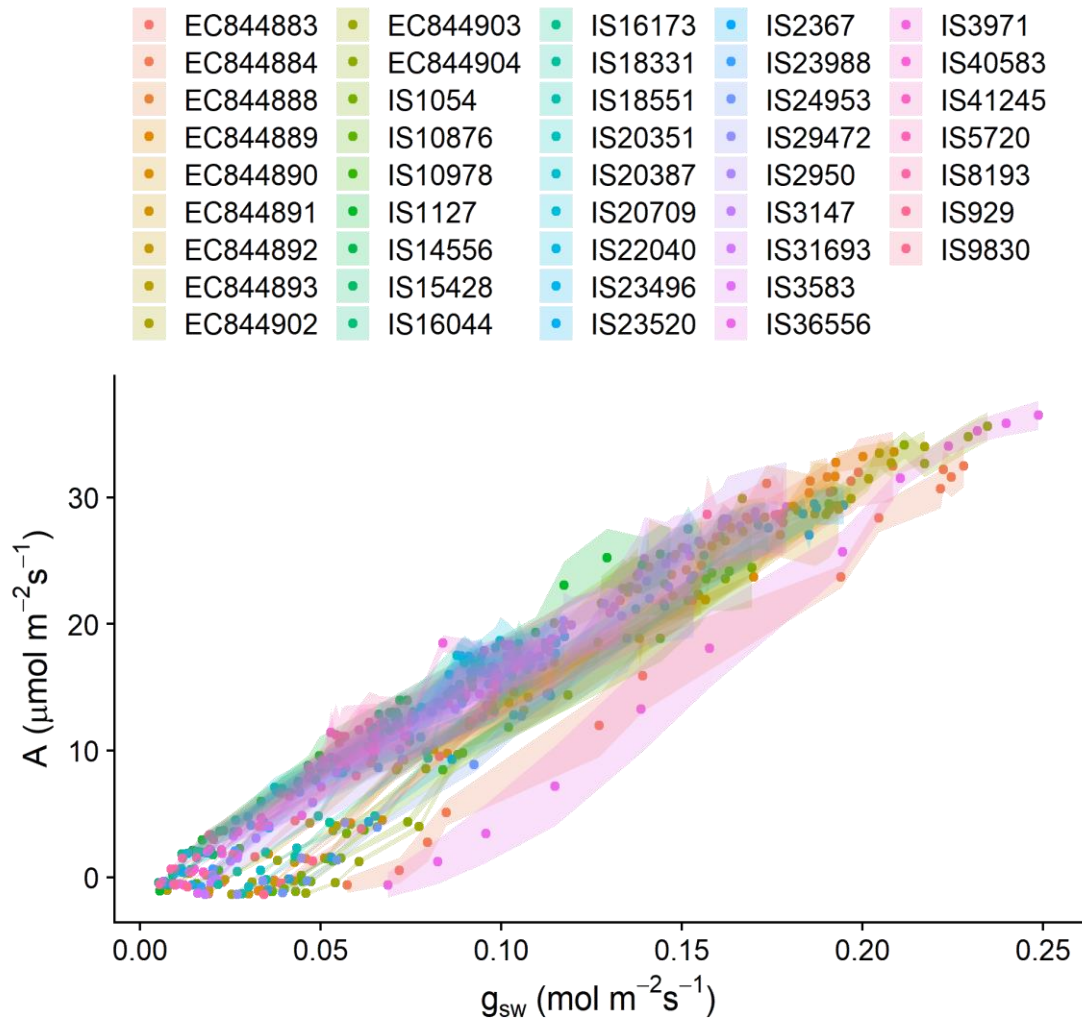

**Supplementary Fig. S2.** (A.) Rate of change of CO<sub>2</sub> assimilation rate (A) relative to stomatal conductance to water (g<sub>s</sub>) in response to changes in PPFD irradiance intensities from 0 to 2000 μmol m<sup>-2</sup> s<sup>-1</sup>, as shown in Fig. 2. Data shown here for all 43 tested accessions. Points indicate mean average of 3-6 plants and ribbons indicate standard error. (B.) Light saturated rate of photosynthetic CO<sub>2</sub> assimilation (A<sub>sat</sub>; A at 2000 μmol m<sup>-2</sup> s<sup>-1</sup>) relative to stomatal conductance under saturating light (g<sub>ssat</sub>; g<sub>s</sub> at 2000 μmol m<sup>-2</sup> s<sup>-1</sup>) for each tested sorghum accession. Points indicate mean average values for accessions as indicated by colour. Error bars indicate standard error of the mean, n= 3-8. Shaded ribbon represent standard error around the mean. Line represents R = 0.99, p <2.2e-16 with a regression formula of y = 1.3 + 150 x.

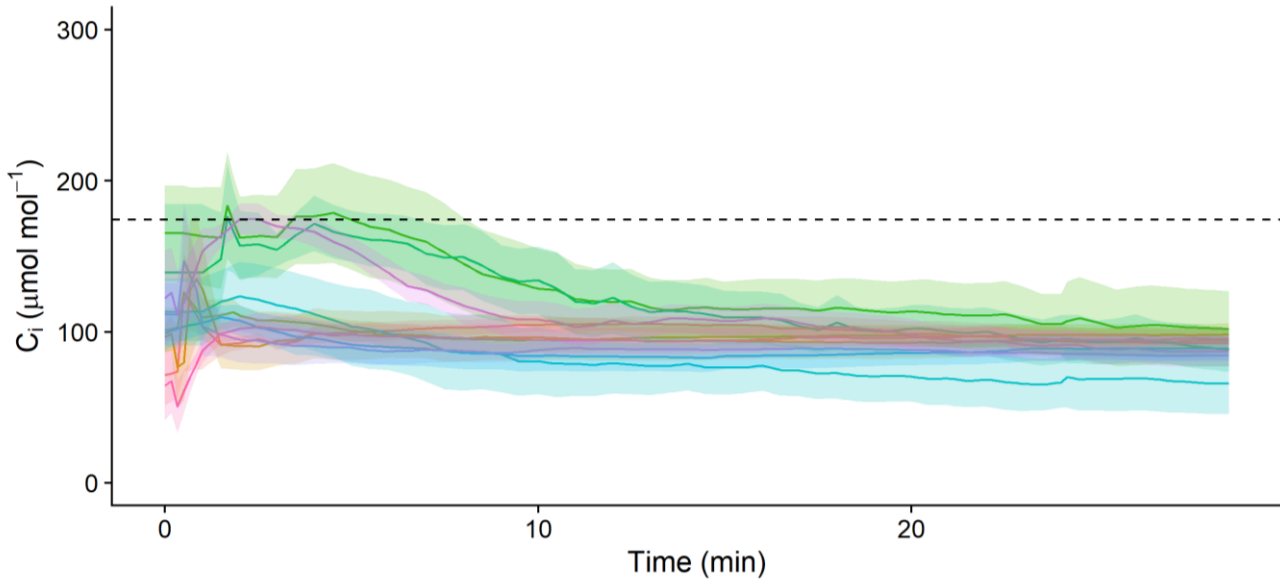

**Supplementary Fig. S3.** Temporal responses of internal CO<sub>2</sub> concentration ( $C_i$ ) to a rapid increase in PPFD irradiance from 100  $\mu\text{mol m}^{-2} \text{s}^{-1}$  to 1000  $\mu\text{mol m}^{-2} \text{s}^{-1}$  in the ten representative sorghum accessions.  $n = 4-8$  Shaded ribbon represent standard error around the mean

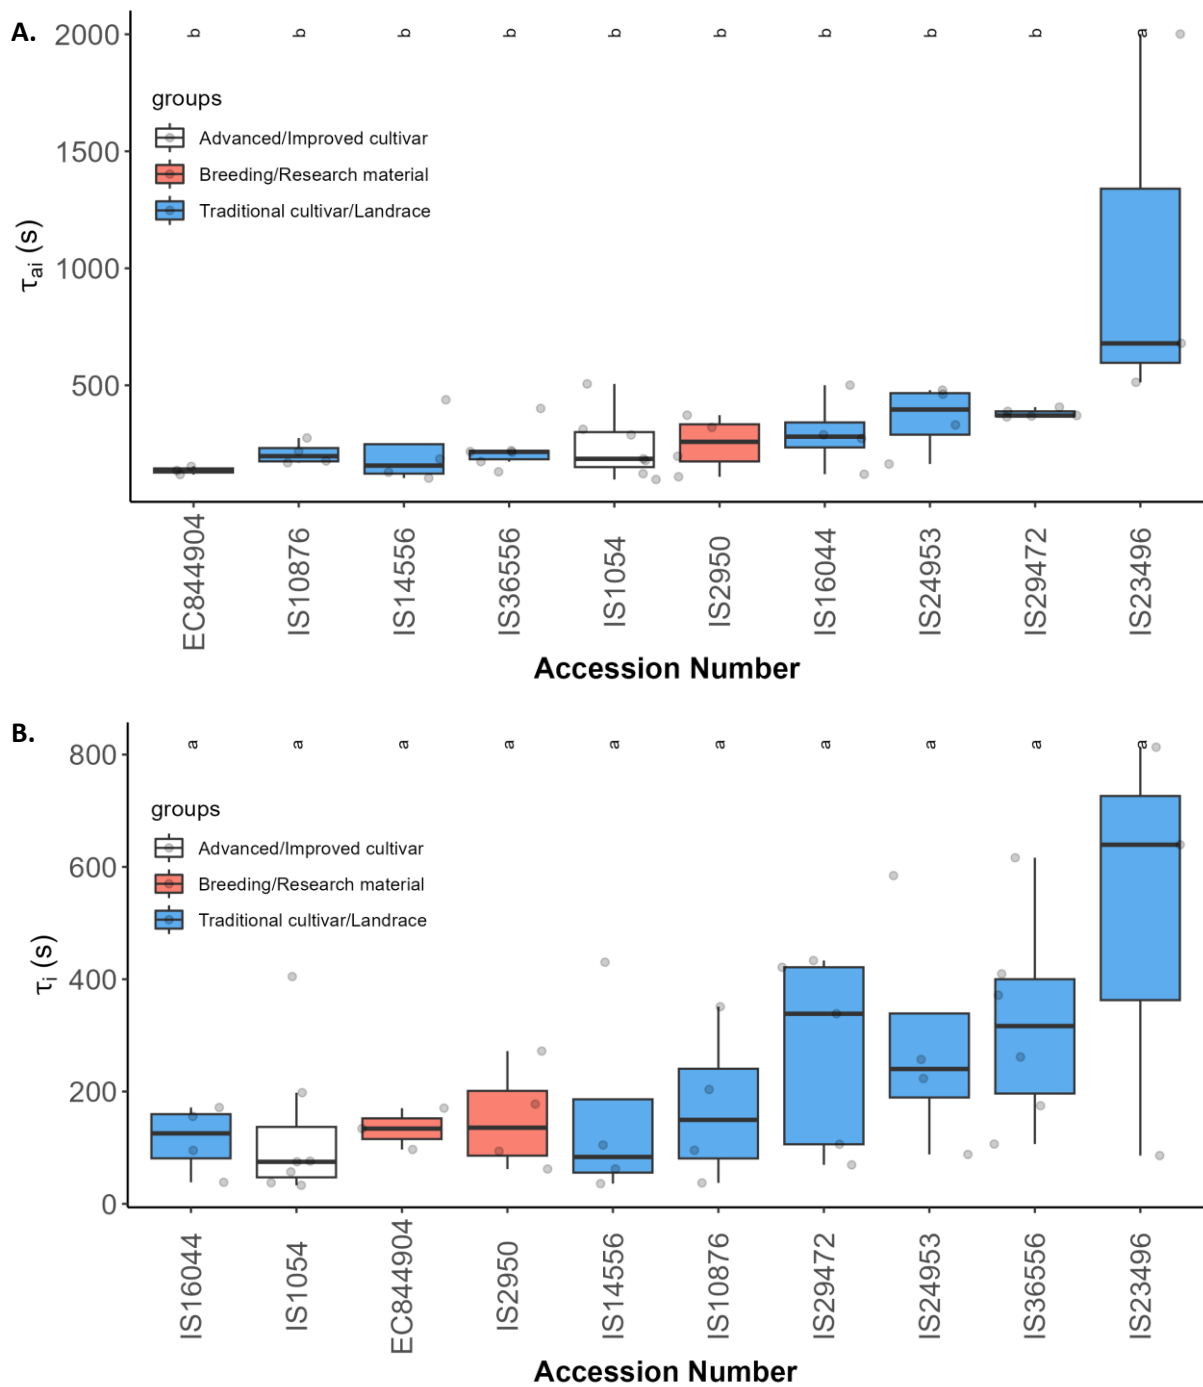

**Supplementary Fig. S4.** Time constants of (A.) light saturated rate of carbon assimilation ( $\tau_{ai}$ ) and (B.) stomatal opening ( $\tau_i$ ) in seconds, shown here for 10 representative sorghum accessions. Accession numbers in A. and B. ordered from lowest to highest mean  $\tau_{ai}$ . Letters indicate significantly different groupings of ANOVA results ( $p \leq 0.05$ ) calculated using a Tukey's test,  $n = 3-8$ .

- |            |            |           |           |           |
|------------|------------|-----------|-----------|-----------|
| ● EC844883 | ● EC844903 | ● IS16173 | ● IS2367  | ● IS3971  |
| ● EC844884 | ● EC844904 | ● IS18331 | ● IS23988 | ● IS40583 |
| ● EC844888 | ● IS1054   | ● IS18551 | ● IS24953 | ● IS41245 |
| ● EC844889 | ● IS10876  | ● IS20351 | ● IS29472 | ● IS5720  |
| ● EC844890 | ● IS10978  | ● IS20387 | ● IS2950  | ● IS8193  |
| ● EC844891 | ● IS1127   | ● IS20709 | ● IS3147  | ● IS929   |
| ● EC844892 | ● IS14556  | ● IS22040 | ● IS31693 | ● IS9830  |
| ● EC844893 | ● IS15428  | ● IS23496 | ● IS3583  |           |
| ● EC844902 | ● IS16044  | ● IS23520 | ● IS36556 |           |

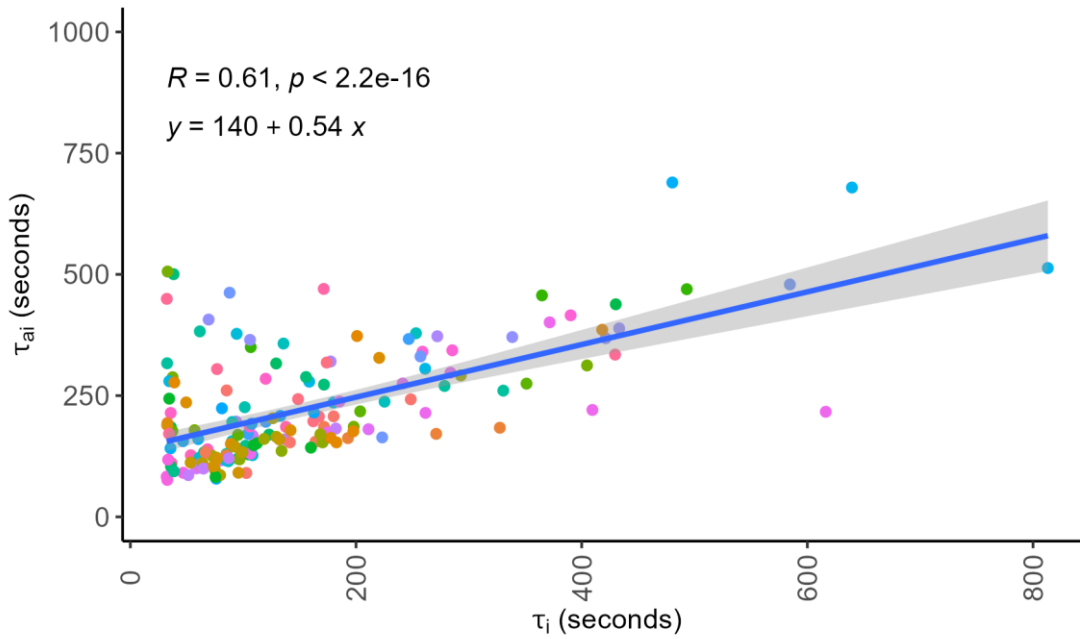

**Supplementary Fig. S5.** Association between the light saturated rate of carbon assimilation ( $\tau_{ai}$ ) and speed of stomatal opening ( $\tau_i$ ) in seconds. Each point indicates an individual plant. Accession number is indicated by colour. Line represents  $R = 0.67, p < 2.2e-16$  with a regression formula of  $y = 150 + 0.51 x, n = 3-8$ .

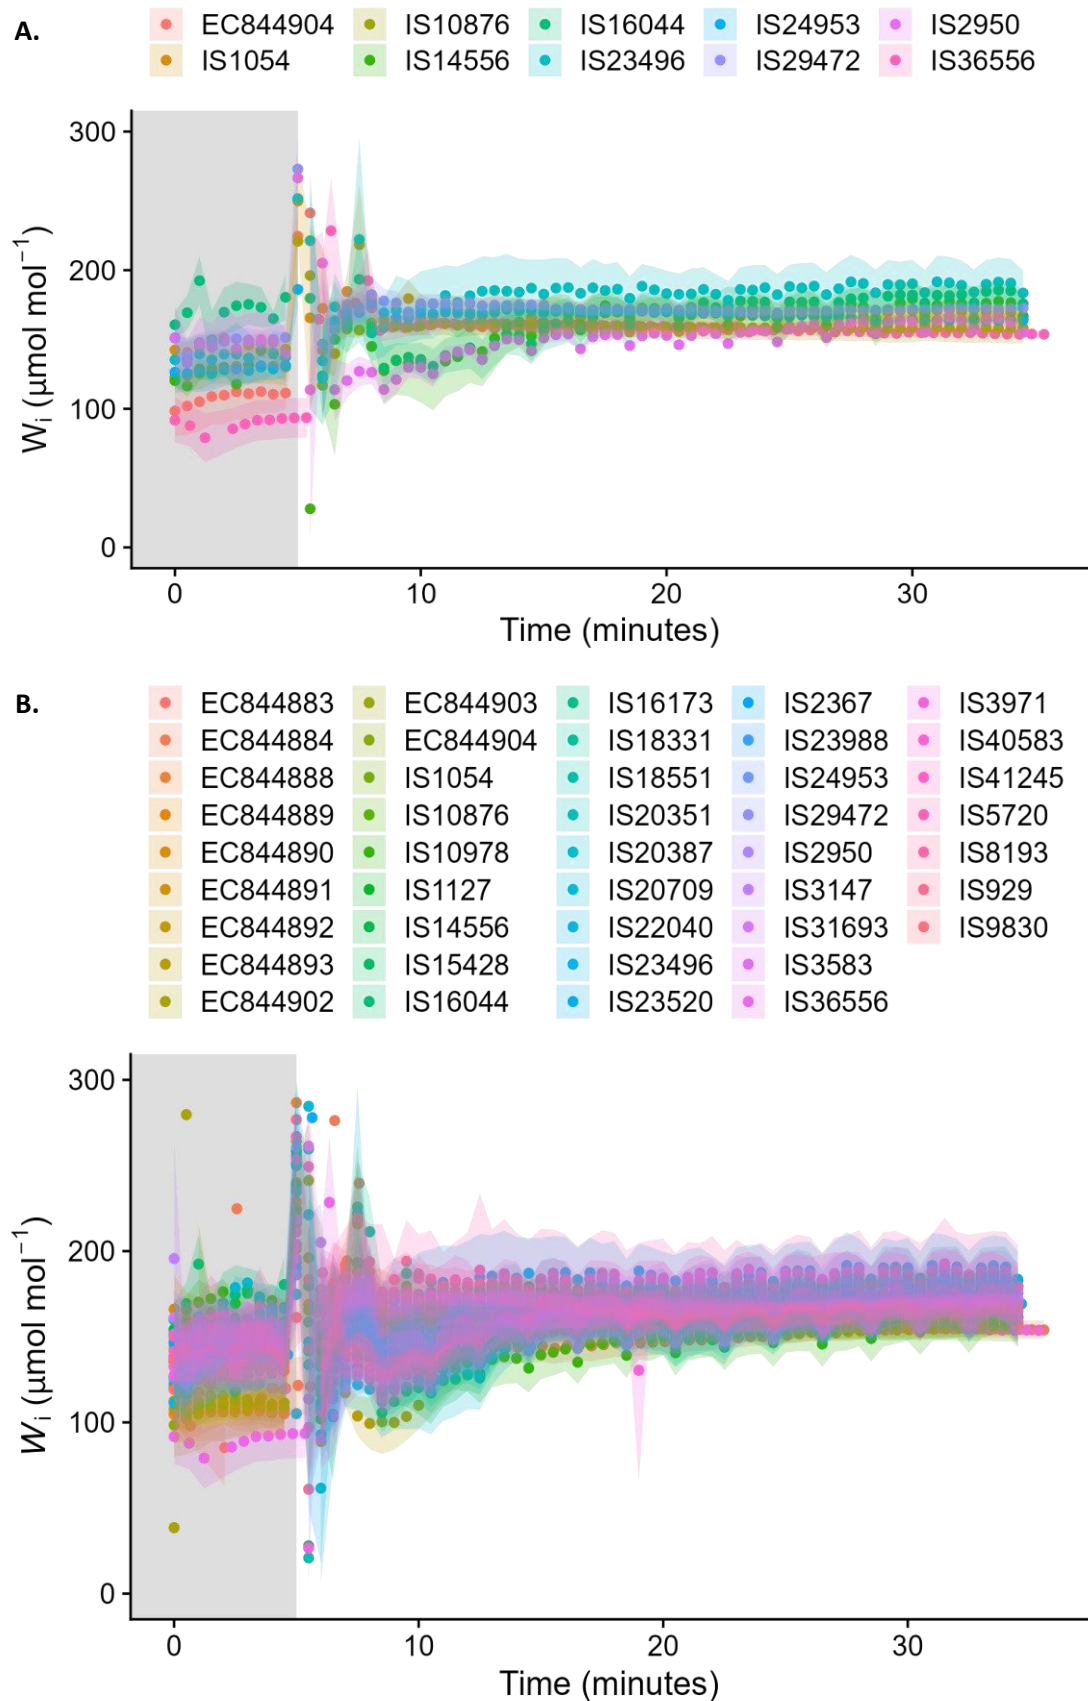

**Supplementary Fig. S6.** Temporal response of intrinsic water use efficiency ( $W_i$ ) to a rapid increase in PPFD irradiance from  $100 \mu\text{mol m}^{-2} \text{s}^{-1}$  (shaded area) to  $1000 \mu\text{mol m}^{-2} \text{s}^{-1}$  in (A.) ten representative sorghum accessions and (B.) all measured accessions.  $n = 3-8$ . Shaded ribbon represent standard error around the mean.





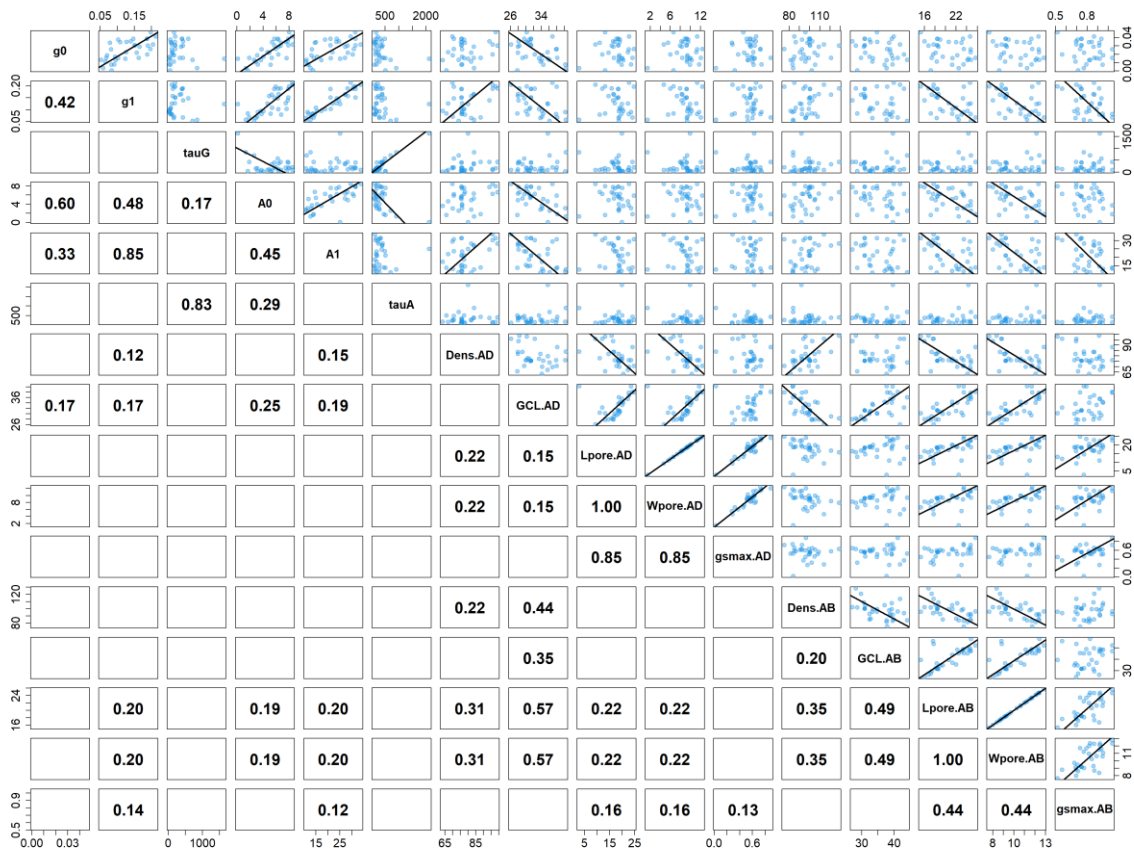

**Supplementary Fig. S8.** Matrix representing multiple regressions (using standard major axis) between modelled parameters describing the rapidity of stomatal and net CO<sub>2</sub> assimilation response and leaf anatomical parameters. Values in the lower panel represent the R<sup>2</sup> of the regression for each parameter pair, n= 3-8. Only significant regressions (p < 0.05) were represented by a line in the upper panel. Parameters g<sub>0</sub>, A<sub>0</sub> and g<sub>1</sub>, A<sub>1</sub> represent the initial and final value for g<sub>s</sub> and A during a step change in light intensity; τ<sub>g</sub> and τ<sub>a</sub> represent the time constant for an increase in g<sub>s</sub> and A; Dens represents the stomatal density; GCL represents the guard cell length; L<sub>pore</sub> and W<sub>pore</sub> represent the length and width of the stomatal pore; g<sub>smax</sub> represents the maximum anatomical g<sub>s</sub>; Suffixes AD and AB represent the adaxial and abaxial side of the leaf.
